# Supplementary material
Source: publisher figshare collection journal article supplement (https://karger.figshare.com/ndownloader/files/23167163)
Supplement: Supplementary file 1 [file 23167163]

| **Supplement file 1. Prevalence and severity of sensory and motor peripheral neuropathy symptoms across different assessment points** | | | | | | | | | | | |
| --- | --- | --- | --- | --- | --- | --- | --- | --- | --- | --- | --- |
| Symptoms | Baseline  (n=127) | Cycle1  (n=121) | Cycle2  (n=119) | Cycle3  (n=117) | Cycle4  (n=108) | Cycle5  (n=61) | Cycle6  (n=62) | 6mFU  (n=111) | 9mFU  (n=105) | 12mFU  (n=106) |
| Motor domain |  |  |  |  |  |  |  |  |  |  |
| Cramps in hands |  |  |  |  |  |  |  |  |  |  |
| Prevalence | 2(1.6) | 5(4.1) | 1(0.8) | 2(1.7) | 1(0.9) | 5(8.2) | 2(3.2) | 1(0.9) | 2(1.9) | 3(2.8) |
| Severity | 1.02(0.20) | 1.04(0.20) | 1.06(0.27) | 1.11(0.37) | 1.14(0.42) | 1.08(0.28) | 1.03(0.18) | 1.01(0.10) | 1.02(0.14) | 1.03(0.17) |
| Cramps in feet |  |  |  |  |  |  |  |  |  |  |
| Prevalence | 11(8.7) | 6(5.0) | 6(5.0) | 7(5.5) | 7(6.5) | 3(4.9) | 2(3.2) | 5(4.5) | 10(9.5) | 13(12.3) |
| Severity | 1.09(0.28) | 1.05(0.22) | 1.01(0.09) | 1.06(0.24) | 1.04(0.19) | 1.05(0.22) | 1.03(0.18) | 1.05(0.27) | 1.13(0.46) | 1.13(0.37) |
| Problem holding a pen, which made writing difficult |  |  |  |  |  |  |  |  |  |  |
| Prevalence | 0(0.0) | 1(0.8) | 3(2.5) | 3(2.6) | 2(1.9) | 3(4.9) | 3(4.8) | 8(7.2) | 7(6.7) | 5(4.7) |
| Severity** | 1.00(0.00) | 1.01(0.09) | 1.03(0.16) | 1.03(0.16) | 1.02(0.14) | 1.05(0.22) | 1.06(0.31) | 1.13(0.49) | 1.10(0.41) | 1.05(0.21) |
| Difficulty manipulating small objects with fingers (for example, fastening small buttons) |  |  |  |  |  |  |  |  |  |  |
| Prevalence | 0(0.0) | 1(0.8) | 3(2.5) | 5(4.3) | 5(4.6) | 2(3.3) | 4(6.5) | 9(8.1) | 11(10.5) | 8(7.5) |
| Severity* | 1.00(0.00) | 1.01(0.09) | 1.03(0.16) | 1.05(0.26) | 1.06(0.31) | 1.03(0.18) | 1.08(0.33) | 1.13(0.47) | 1.15(0.48) | 1.08(0.27) |
| Difficulty opening a jar or bottle because of weakness in hands |  |  |  |  |  |  |  |  |  |  |
| Prevalence | 19(15.0) | 11(9.1) | 13(10.9) | 16(13.7) | 20(18.5) | 11(18.0) | 15(24.2) | 15(13.5) | 16(15.2) | 13(12.3) |
| Severity* | 1.16(0.39) | 1.09(0.29) | 1.12(0.35) | 1.15(3.38) | 1.22(0.50) | 1.18(0.39) | 1.27(0.52) | 1.18(0.51) | 1.20(0.51) | 1.12(0.33) |
| Difficulty walking because feet dropped downwards |  |  |  |  |  |  |  |  |  |  |
| Prevalence | 0(0.0) | 1(0.8) | 3(2.5) | 7(6.0) | 8(7.4) | 9(14.8) | 9(14.5) | 13(11.7) | 12(11.4) | 8(7.5) |
| Severity*** | 1.00(0.00) | 1.01(0.09) | 1.03(0.16) | 1.06(0.24) | 1.09(0.35) | 1.18(0.17) | 1.16(0.41) | 1.17(0.52) | 1.13(0.39) | 1.09(0.35) |
| Difficulty climbing stairs or getting up out of a chair because of weakness in legs |  |  |  |  |  |  |  |  |  |  |
| Prevalence | 16(12.6) | 13(10.7) | 19(16.0) | 30(25.6) | 29(26.9) | 15(24.6) | 13(21.0) | 16(14.4) | 13(12.4) | 13(12.3) |
| Severity*** | 1.13(0.33) | 1.12(0.38) | 1.20(0.50) | 1.35(0.67) | 1.44(0.82) | 1.33(0.68) | 1.27(0.61) | 1.20(0.52) | 1.14(0.40) | 1.14(0.40) |
| Sensory domain |  |  |  |  |  |  |  |  |  |  |
| Tingling fingers/hands |  |  |  |  |  |  |  |  |  |  |
| Prevalence | 4(3.1) | 9(7.4) | 7(5.8) | 11(9.4) | 13(12.0) | 7(11.5) | 5(8.1) | 9(8.1) | 8(7.6) | 1(0.9) |
| Severity* | 1.03(0.18) | 1.07(0.26) | 1.07(0.28) | 1.10(0.33) | 1.14(0.40) | 1.15(0.44) | 1.13(0.46) | 1.11(0.41) | 1.09(0.31) | 1.01(0.10) |
| Tingling toes or feet |  |  |  |  |  |  |  |  |  |  |
| Prevalence | 2(1.6) | 4(3.3) | 3(2.5) | 9(7.7) | 11(10.2) | 7(11.5) | 7(11.3) | 12(10.8) | 7(6.7) | 2(1.9) |
| Severity ** | 1.02(0.13) | 1.03(0.18) | 1.03(0.22) | 1.09(0.31) | 1.13(0.41) | 1.16(0.52) | 1.16(0.19) | 1.16(0.51) | 1.08(0.30) | 1.02(0.14) |
| Numbness in fingers or hands |  |  |  |  |  |  |  |  |  |  |
| Prevalence | 21(16.5) | 18(14.9) | 24(20.2) | 31(26.5) | 34(31.5) | 19(31.1) | 27(43.5) | 43(38.7) | 36(34.3) | 27(25.5) |
| Severity *** | 1.17(0.40) | 1.15(0.36) | 1.22 (0.47) | 1.30(0.55) | 1.38(0.62) | 1.41(0.69) | 1.73(0.96) | 1.57(0.84) | 1.42(0.65) | 1.30(0.56) |
| Numbness in toes or feet |  |  |  |  |  |  |  |  |  |  |
| Prevalence | 7(5.5) | 8(6.6) | 14(11.8) | 23(19.7) | 29(26.9) | 15(24.6) | 26(37.1) | 38(34.2) | 29(27.6) | 25(23.6) |
| Severity *** | 1.06(0.23) | 1.07(0.25) | 1.22(0.47) | 1.22(0.49) | 1.32(0.59) | 1.34(0.70) | 1.50(0.74) | 1.48(0.74) | 1.37(0.67) | 1.29(0.57) |
| Shooting or burning pain in fingers or hands |  |  |  |  |  |  |  |  |  |  |
| Prevalence | 5(3.9) | 5(4.1) | 5(4.2) | 8(6.8) | 5(4.6) | 8(13.1) | 8(12.9) | 10(9.0) | 8(7.6) | 6(5.7) |
| Severity | 1.02(0.25) | 1.04(0.20) | 1.04(0.20) | 1.08(0.30) | 1.06(0.27) | 1.18(0.50) | 1.16(0.49) | 1.15(0.53) | 1.13(0.52) | 1.10(0.43) |
| Shooting or burning pain in toes or feet |  |  |  |  |  |  |  |  |  |  |
| Prevalence | 3(2.4) | 2(1.7) | 4(3.4) | 6(5.1) | 7(6.5) | 5(8.2) | 5(8.1) | 9(8.1) | 6(5.7) | 7(6.6) |
| Severity | 1.02(0.20) | 1.02(0.20) | 1.04(0.24) | 1.06(0.27) | 1.07(0.30) | 1.11(0.41) | 1.10(0.35) | 1.14(0.48) | 1.09(0.40) | 1.09(0.38) |
| Problems standing or walking because of difficulty feeling the ground under feet |  |  |  |  |  |  |  |  |  |  |
| Prevalence | 1(0.8) | 2(1.7) | 6(5.0) | 11(9.4) | 13(12.0) | 13(21.3) | 12(19.4) | 12(10.8) | 12(11.4) | 8(7.5) |
| Severity*** | 1.01(0.09) | 1.02(0.13) | 1.06(0.27) | 1.11(0.37) | 1.14(0.42) | 1.25(0.51) | 1.21(0.45) | 1.17(0.54) | 1.14(0.43) | 1.01(0.10) |
| Difficulty distinguishing between hot and cold water |  |  |  |  |  |  |  |  |  |  |
| Prevalence | 1(0.8) | 0(0.0) | 1(0.8) | 3(2.6) | 4(3.7) | 3(4.9) | 2(3.2) | 6(5.4) | 3(2.9) | 1(0.9) |
| Severity*** | 1.01(0.09) | 1.00(0.00) | 1.01(0.09) | 1.03(0.16) | 1.04(0.19) | 1.05(0.22) | 1.03(0.18) | 1.08(0.39) | 1.04(0.24) | 1.01(0.10) |
| Difficulty hearing |  |  |  |  |  |  |  |  |  |  |
| Prevalence | 9(7.1) | 7(5.8) | 10(8.4) | 10(8.5) | 10(9.3) | 7(11.5) | 6(9.8) | 9(8.1) | 8(7.6) | 11(10.4) |
| Severity | 1.08(0.30) | 1.07(0.32) | 1.08(0.28) | 1.09(0.32) | 1.10(0.33) | 1.13(0.39) | 1.10(0.30) | 1.09(0.32) | 1.10(0.38) | 1.11(0.35) |
| Autonomic domain |  |  |  |  |  |  |  |  |  |  |
| Dizzy when standing up from a sitting or lying position |  |  |  |  |  |  |  |  |  |  |
| Prevalence | 13(10.2) | 16(13.2) | 17(14.3) | 12(10.3) | 14(13.0) | 9(14.8) | 9(14.5) | 8(7.2) | 5(4.8) | 7(6.6) |
| Severity* | 1.10(0.30) | 1.13(0.34) | 1.15(0.38) | 1.10(0.31) | 1.17(0.46) | 1.18(0.47) | 1.19(0.51) | 1.08(0.31) | 1.05(0.21) | 1.07(0.25) |
| Blurred vision |  |  |  |  |  |  |  |  |  |  |
| Prevalence | 24(18.9) | 24(19.8) | 24(20.2) | 27(23.1) | 29(26.9) | 19(31.1) | 18(29.0) | 21(18.9) | 16(15.7) | 18(17.0) |
| Severity | 1.24(0.54) | 1.22(0.48) | 1.22(0.45) | 1.25(0.47) | 1.30(0.53) | 1.34(0.54) | 1.31(1.50) | 1.20(0.42) | 1.17(0.45) | 1.17(0.38) |

Prevalence reported as n(%) of participants choosing at least “2” for the symptom

Severity reported as mean score (standard deviation) for the symptom

*p<0.05 ** p<0.01 *** p<0.001
